# Supplementary material for: Photocatalytic aerobic oxidation of benzylic alcohols and concomitant hydrogen peroxide production
Source: Royal Society of Chemistry journal article supplement (doi:10.1039/d2cc04351c), 2023-01-01
Supplement: d2cc04351c1.pdf [file d2cc04351c1.pdf]

Supporting Information

For

**Photocatalytic Aerobic Oxidation of Benzylic Alcohols and Concomitant Hydrogen Peroxide Production**

Avik Bhattacharjee, Aireth R. LaVigne, Serena M. Frazee, Tyler L. Herrera, Theresa M. McCormick\*

Department of Chemistry, College of Liberal Arts & Sciences, Portland State University, Post Office Box 751 CHEM, Portland, Oregon 97207, USA

Email: [t.m.mccormick@pdx.edu](mailto:t.m.mccormick@pdx.edu)

|                                                                          |     |
|--------------------------------------------------------------------------|-----|
| Experimental methodologies.....                                          | S2  |
| Computational methodologies.....                                         | S4  |
| <sup>1</sup> H NMR spectra of oxidation of benzhydrol.....               | S4  |
| <sup>1</sup> H NMR spectrum of oxidation of benzyl alcohol.....          | S6  |
| Yields of various alcohol oxidation reactions .....                      | S7  |
| UV-Vis absorption of Ti-dye.....                                         | S8  |
| On-off experiment .....                                                  | S8  |
| Time-dependent <sup>1</sup> H NMR spectrum for benzhydrol oxidation..... | S9  |
| Cartesian coordinates for the modeled structures.....                    | S10 |
| References.....                                                          | S15 |

## Experimental methodologies

All chemicals used in this study were purchased from Tokyo Chemical Industries (TCI).

### Photochemical oxidation of benzyl alcohols

In a 10 mL round bottom flask equipped with a stir bar, benzhydrol (5 mmol) was dissolved in a 5 mL solution of Rose Bengal ( $1 \times 10^{-4}$  M) in acetonitrile. Solid NHPI (0.25 mmol) was added to the solution. The flask was sealed with a balloon filled with oxygen gas. The contents of the flask were stirred (1500 rpm) while being irradiated with a ring of white LEDs (Solid Apollo 24 W 16 ft) at room temperature for 72 hours.

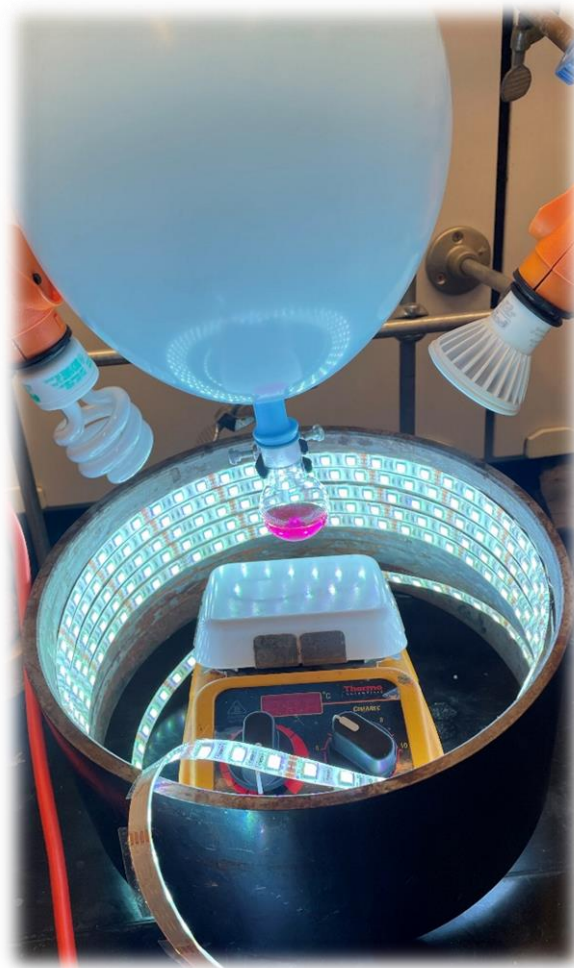

### Extraction of hydrogen peroxide (H<sub>2</sub>O<sub>2</sub>)

The reaction mixture (5 mL) was mixed with toluene (5 mL) in a separatory funnel. The organic layer was extracted with water (5 mL).<sup>1</sup> The presence of H<sub>2</sub>O<sub>2</sub> was confirmed in the aqueous layer using quantitative peroxide test-strips (MilliporeSigma™ MQuant™).

## Quenching experiments

In a 10 mL round bottom flask equipped with a stir bar, benzhydrol (5 mmol) was dissolved in a 5 mL solution of Rose Bengal ( $1 \times 10^{-4}$  M) in acetonitrile. Different quenching agents (5 mmol) and solid NHPI (0.25 mmol) were added to the solution for different experiments. The flask was sealed with a balloon filled with oxygen gas. The contents of the flask were stirred (1500 rpm) while being irradiated with a ring of white LEDs at room temperature for 72 hours.<sup>2</sup>

## Quantification of products using $^1\text{H}$ NMR spectroscopy

500  $\mu\text{L}$  of the reaction mixture was pipetted in a 5 mL round bottom flask and mixed with 500  $\mu\text{L}$  of 1M ethylene carbonate (internal standard) in acetonitrile solution. The acetonitrile was evaporated on a rotary evaporator. The contents of the flask were redissolved in 500  $\mu\text{L}$  of  $\text{CD}_3\text{CN}$ .  $^1\text{H}$  NMR was performed using a 400 MHz Bruker (b400) spectrometer.

## Determination of the presence of hydrogen peroxide using a Ti-porphyrin dye

A 5 M solution of  $[\text{TiO}(\text{TPyPH})_4]^{4+}$  was prepared by dissolving 34.03 mg of the dye in 1 L of 0.05 M hydrochloric acid. To 250  $\mu\text{L}$  DI water, 250  $\mu\text{L}$  4.8 M perchloric acid and 250  $\mu\text{L}$   $[\text{TiO}(\text{TPyPH})_4]^{4+}$  dye solution was added. The solution was mixed and allowed to stand for 5 minutes at room temperature. This solution was further diluted with 2.5 mL of DI water. The absorbance of this solution was measured. The solution was mixed with a sample of  $\text{H}_2\text{O}_2$  solution of known concentration, the aqueous extract of the reaction mixture, and a blank.<sup>3</sup> The absorption data for all the solutions were measured using a Shimadzu UV-3600 spectrometer.

## Quantification of $\text{H}_2\text{O}_2$ by iodometric titration.

A 0.5 mL aliquot of a benzhydrol oxidation reaction at 48 h was extracted using 5 mL of  $\text{H}_2\text{O}$ . 1.2 mmol of potassium iodide and 1 mL of 1 M HCl was added to the aqueous solution. A second solution containing 0.1 M of  $\text{Na}_2\text{S}_2\text{O}_3$  in water was titrated into the first solution that was a brown/black color. When the reaction began to lighten 5 drops of a 1 N starch solution was added. The titration continued until reaction became clear yellow. Analysis done in triplicate yielded 9% hydrogen peroxide after 48 hr.

## Generation of singlet oxygen without light.<sup>4</sup>

Benzhydrol, 0.93 g (5.0 mmol) was added to 5 ml of acetonitrile and heated to 40  $^\circ\text{C}$ . *N*-hydroxyphthalimide, 0.042 g (0.5 mmol), and  $\text{Li}_2\text{MoO}_4$ , 0.87 g (5 mmol) was added to the solution. The reaction flask was covered using aluminum foil. 2.5 ml (22 mmol) hydrogen peroxide 30% by weight was added in 0.5 ml increments over the course of 5 hours and was stirred for 24 hours. By  $^1\text{H}$  NMR, 50% conversion to benzophenone was observed after 24 hours of reaction time. The same reaction conditions with no NHPI showed no oxidized products by NMR after 24 hours.

## Computational methodologies

All computational modeling was done using Gaussian 09 quantum chemistry package and were run on a HPC cluster.<sup>5</sup> The optimization calculations were done using M06-2X functional and 6-311+G(d) basis sets in PCM acetonitrile solvation model.<sup>6</sup> Normal mode frequency calculations were done on the optimized structures to confirm the convergence to a true stationary point with no imaginary frequencies. Gibbs energy change of the reactions were calculated using Hess' law of constant heat summation.

## <sup>1</sup>H NMR Spectrum for aerobic oxidation of secondary benzylic alcohol

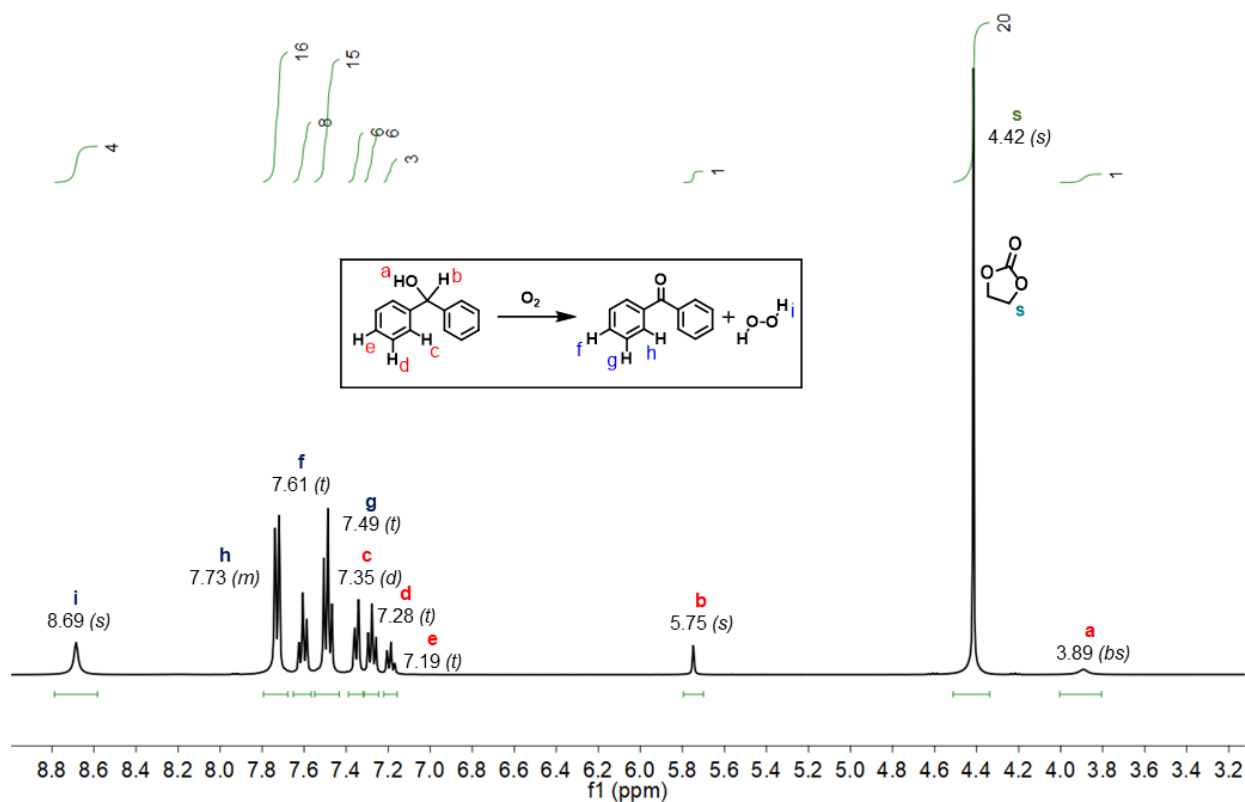

**Figure S1.** A <sup>1</sup>H NMR spectrum acquired in CD<sub>3</sub>CN using 400 MHz spectrometer for the reaction mixture of the photochemical aerobic oxidation of benzhydrol in presence of an internal standard (ethylene carbonate, s) after 3 days of irradiation time. The peaks indicated using red correspond to the starting material whereas the peaks indicated in blue are for the oxidation products: benzophenone and H<sub>2</sub>O<sub>2</sub>.

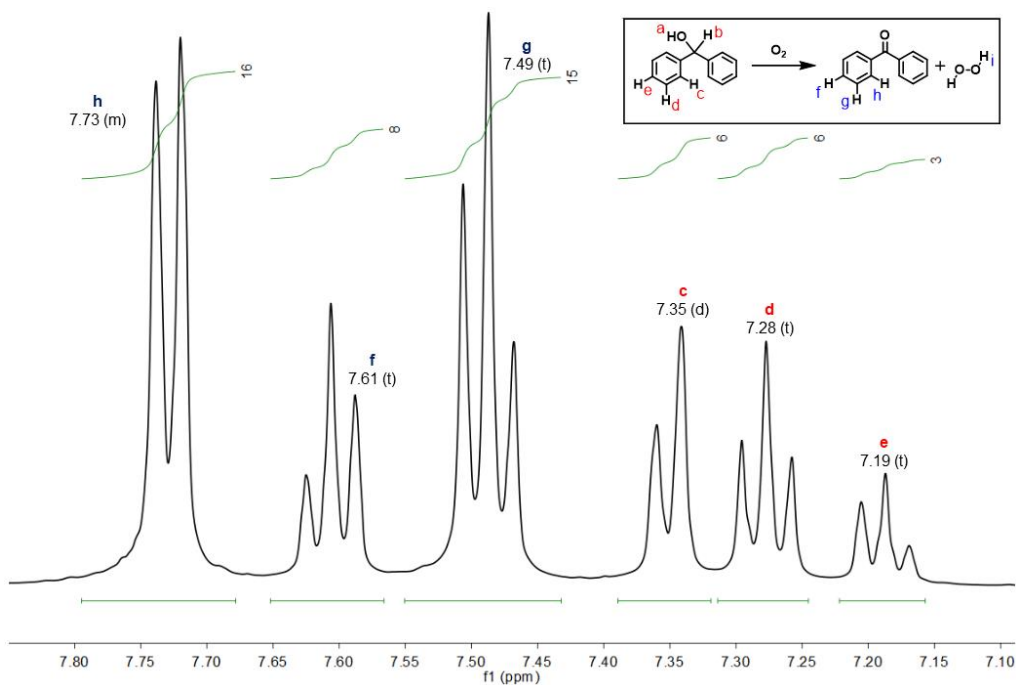

**Figure S2.** The enlarged image of the aromatic region of previously shown <sup>1</sup>H NMR spectrum of the benzhydrol oxidation reaction. The peaks marked as c, d, and e (shown in red) are the aromatic protons of benzhydrol whereas f, g, and h (shown in blue) correspond to the aromatic protons of benzophenone.

## <sup>1</sup>H NMR Spectrum for aerobic oxidation of primary benzylic alcohol

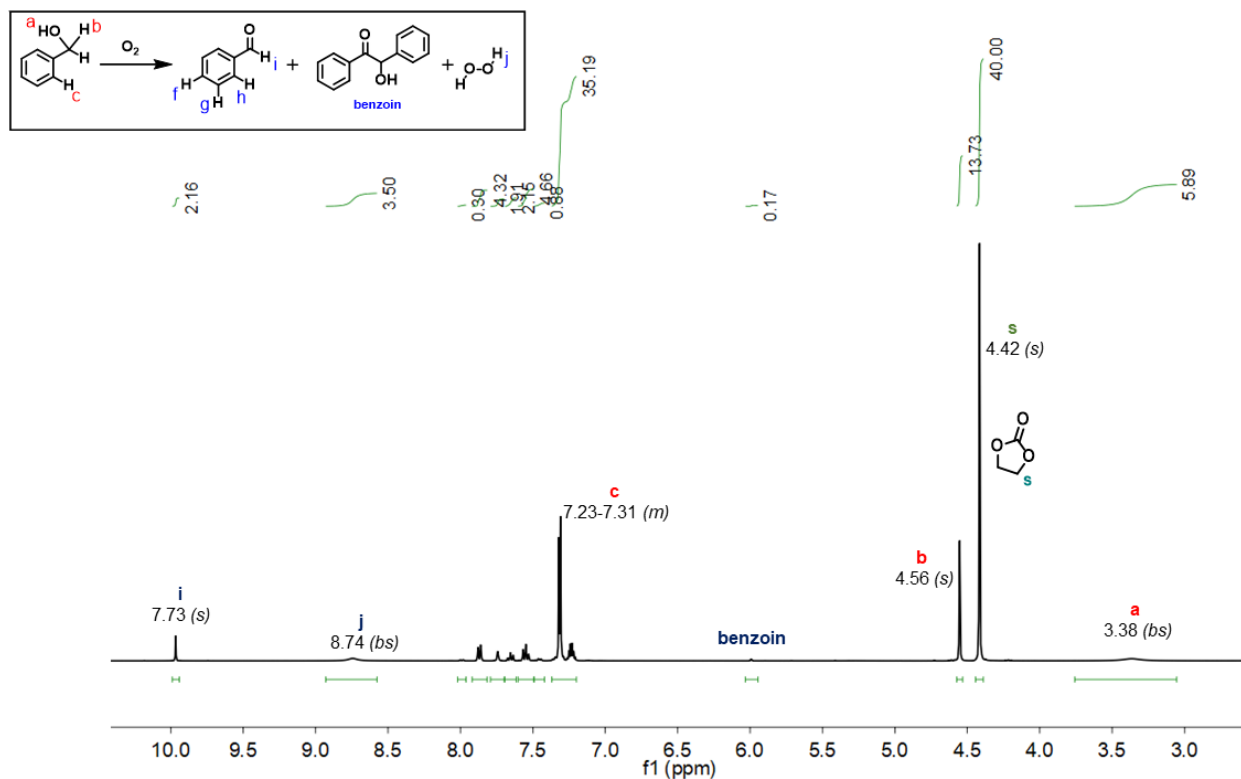

**Figure S3.** A <sup>1</sup>H NMR spectrum acquired in CD<sub>3</sub>CN using 400 MHz spectrometer for the reaction mixture of the photochemical aerobic oxidation of benzyl alcohol in presence of an internal standard (ethylene carbonate, **s**) after 3 days of irradiation time. The peaks indicated using red correspond to the starting material whereas the peaks indicated in blue are for the oxidation products: benzaldehyde, H<sub>2</sub>O<sub>2</sub>, and benzoin.

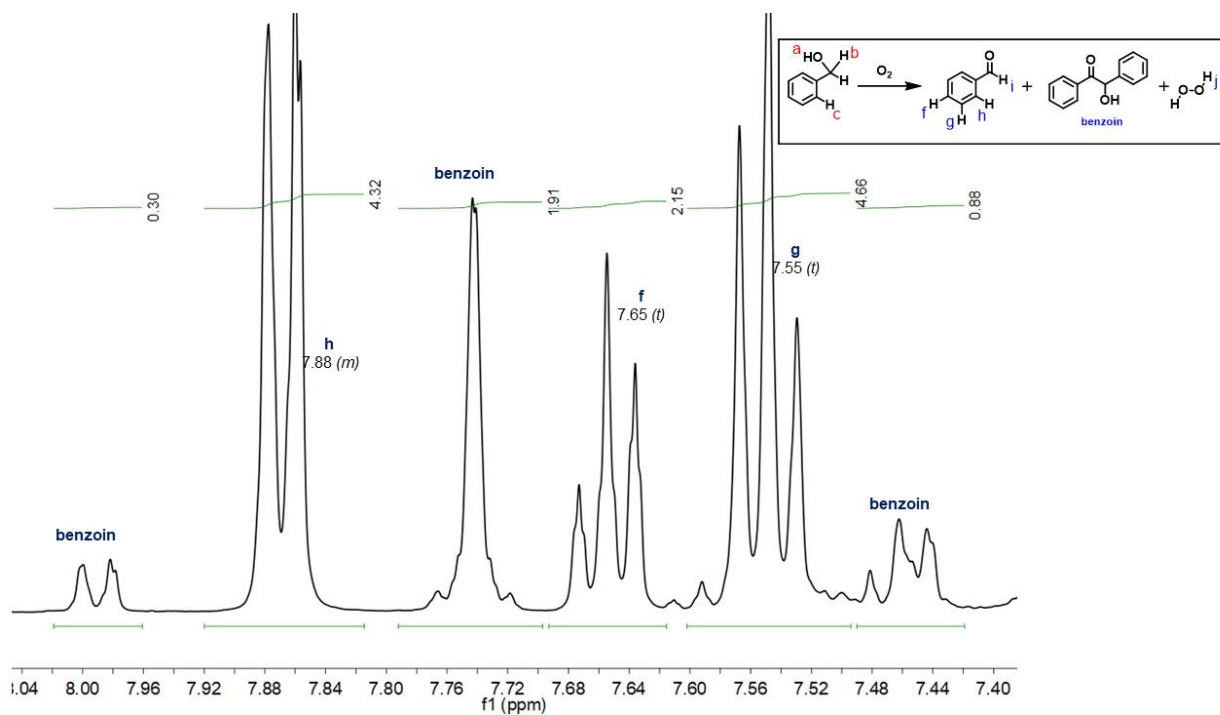

**Figure S4.** The enlarged image of the aromatic region of previously shown <sup>1</sup>H NMR spectrum of the benzyl alcohol oxidation reaction. The peaks marked as f, g, and h (shown in blue) correspond to the aromatic protons of benzaldehyde and the other peaks in correspond to the condensation product, benzoin.

**Table S1.** Yield of conversion for various alcohols. Reactions were run with 5 mmol alcohol NHPI (5 mol%) catalyst and Rose Bengal, (RB) ( $1 \times 10^{-4}$ ) in 5 mL acetonitrile (ACN) under white light irradiation at room temperature for 72 hours

| Starting material       | 72 h Yield |
|-------------------------|------------|
| (E)- Cinnamyl alcohol   | 5%         |
| (±)-Phenylethyl alcohol | 8%         |
| Diphenylmethanol        | 39%        |
| Phenylmethanol          | 29%        |

## UV Vis absorption of the Ti-porphyrin dye in presence and absence of hydrogen peroxide

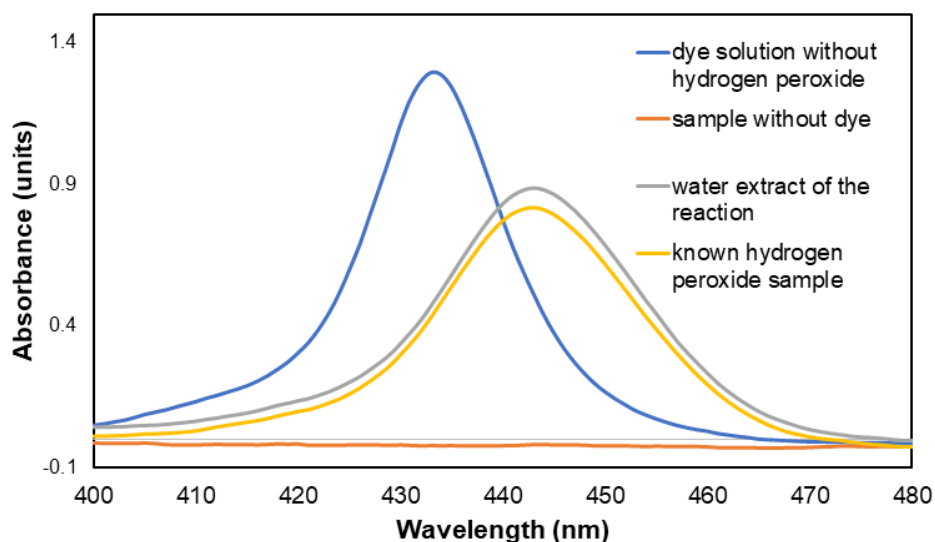

**Figure S5.** The UV-Vis spectrum of the Ti-porphyrin dye (blue) shows a characteristic absorption band at 432 nm. The characteristic peak is missing in absence of the dye (orange). The water extract of the reaction mixture (grey), and a hydrogen peroxide solution of known concentration (yellow) shows a shift in the absorption peak to 445 nm.<sup>3</sup>

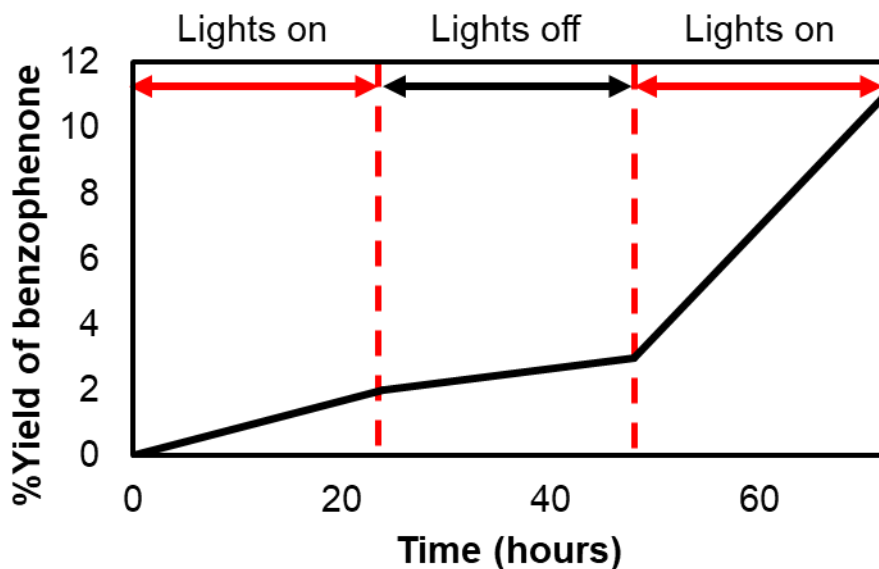

**Figure S6.** Yield of benzophenone with 1 day of irradiation, followed by 1 day in the dark, and 1 day irradiated. The yields were determined by <sup>1</sup>H NMR, reaction contained diphenylmethanol (1, 5 mmol), NHPI (5 mol%) Rose Bengal, ( $1 \times 10^{-4}$  M) in 5 mL acetonitrile (ACN) under white light irradiation at room temperature.



## $^1\text{H}$ NMR of the secondary alcohol oxidation with respect to time

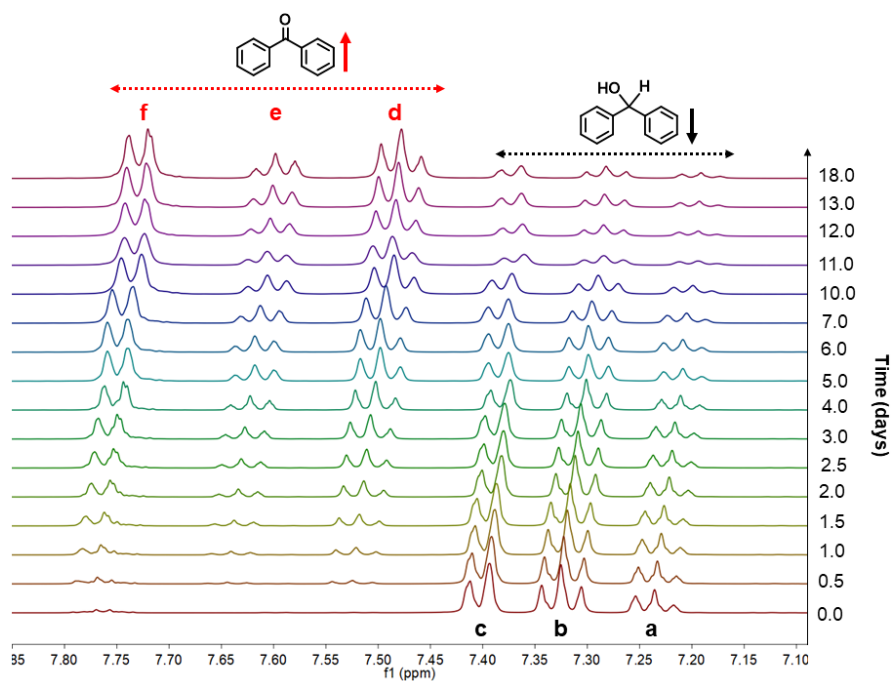

**Figure S7.** The  $^1\text{H}$  NMR plot of the aromatic region of the benzhydrol oxidation reaction mixture taken in  $\text{CD}_3\text{CN}$  before irradiation with white light ( $t = 0$  days) through 18 days of irradiation. The peaks a, b, and c (indicated in black) correspond to the starting material and d, e, and f (indicated in red) correspond to the product. The intensities of the peaks a, b, and c decreases over time whereas the intensity of the product peaks: d, e, and f are increasing with the progression of the reaction.

## Cartesian coordinates

### Benzhydrol (1)

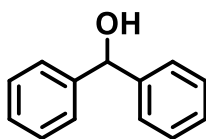

|   |             |             |             |
|---|-------------|-------------|-------------|
| C | -2.69926600 | -1.63977000 | -0.41932700 |
| C | -1.57568000 | -0.97484200 | -0.89513100 |
| C | -1.25333700 | 0.29931300  | -0.42374900 |
| C | -2.07185200 | 0.90196200  | 0.52830100  |
| C | -3.19921400 | 0.23467000  | 1.00568400  |
| C | -3.51544300 | -1.03533500 | 0.53585300  |
| H | -2.94109200 | -2.62732700 | -0.79455500 |
| H | -0.94031800 | -1.44710800 | -1.63858700 |
| H | -1.82795000 | 1.89342700  | 0.88845600  |
| H | -3.83149500 | 0.71179500  | 1.74563100  |
| H | -4.39314300 | -1.55131300 | 0.90683700  |
| C | 0.00518300  | 0.97480400  | -0.93291700 |
| H | 0.04549100  | 0.84852600  | -2.02147300 |
| C | 1.24423600  | 0.32907300  | -0.33519300 |
| C | 2.13063100  | -0.38504900 | -1.13646500 |
| C | 1.49838000  | 0.44545700  | 1.03366000  |
| C | 3.25945800  | -0.98448500 | -0.57852700 |
| H | 1.94102500  | -0.47244400 | -2.20149800 |
| C | 2.62616100  | -0.14454300 | 1.58991100  |
| H | 0.80684100  | 1.00209800  | 1.65819900  |
| C | 3.50892800  | -0.86396900 | 0.78375200  |
| H | 3.94319100  | -1.53949800 | -1.21008400 |
| H | 2.81802000  | -0.04840700 | 2.65224300  |
| H | 4.38731700  | -1.32573000 | 1.21895700  |
| O | -0.06562800 | 2.35598800  | -0.60953000 |
| H | 0.76802400  | 2.76436300  | -0.86298900 |

### Benzophenone (3)

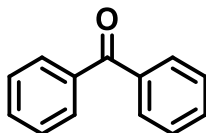

|   |             |             |            |
|---|-------------|-------------|------------|
| C | -2.64881600 | -1.50560300 | 0.74207500 |
| C | -1.41206200 | -0.87196300 | 0.67788300 |

|   |             |             |             |
|---|-------------|-------------|-------------|
| C | -1.29209900 | 0.35991800  | 0.03015400  |
| C | -2.41709800 | 0.94947400  | -0.55296500 |
| C | -3.64528600 | 0.30394700  | -0.50821600 |
| C | -3.76202900 | -0.92328300 | 0.14279800  |
| H | -2.74259000 | -2.45371600 | 1.25754200  |
| H | -0.54773200 | -1.32475300 | 1.14948300  |
| H | -2.31250400 | 1.91062500  | -1.04255600 |
| H | -4.51213700 | 0.75605900  | -0.97484000 |
| H | -4.72210500 | -1.42412700 | 0.18516300  |
| C | -0.00001100 | 1.11354800  | -0.00014600 |
| C | 1.29208500  | 0.35992900  | -0.03029300 |
| C | 1.41214600  | -0.87194000 | -0.67802700 |
| C | 2.41700500  | 0.94948900  | 0.55297700  |
| C | 2.64891700  | -1.50556200 | -0.74207500 |
| H | 0.54788300  | -1.32473200 | -1.14974800 |
| C | 3.64520700  | 0.30398200  | 0.50836900  |
| H | 2.31233600  | 1.91063100  | 1.04257000  |
| C | 3.76204700  | -0.92323800 | -0.14264900 |
| H | 2.74276800  | -2.45366600 | -1.25754700 |
| H | 4.51199600  | 0.75609600  | 0.97510600  |
| H | 4.72213500  | -1.42406800 | -0.18490100 |
| O | -0.00001200 | 2.32993400  | 0.00005400  |

Intermediate 1 (Int 1)

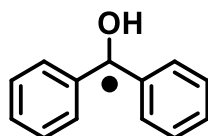

|   |             |             |             |
|---|-------------|-------------|-------------|
| C | -2.71475400 | -1.61462200 | 0.52355200  |
| C | -1.45818300 | -1.03327200 | 0.46593100  |
| C | -1.29577000 | 0.29139500  | 0.00163100  |
| C | -2.45655400 | 1.01026200  | -0.36325500 |
| C | -3.70802900 | 0.41767800  | -0.30013100 |
| C | -3.84898400 | -0.89978100 | 0.13605000  |
| H | -2.81394300 | -2.62988400 | 0.88979900  |
| H | -0.59848000 | -1.59245800 | 0.81287900  |
| H | -2.35629500 | 2.03122300  | -0.70792200 |
| H | -4.58250200 | 0.98666700  | -0.59473600 |
| H | -4.82859600 | -1.35943400 | 0.18519600  |
| C | -0.01162900 | 0.93518500  | -0.05188000 |
| C | 1.28566800  | 0.29464300  | -0.03470300 |
| C | 1.49400800  | -0.98475300 | -0.59166100 |

|   |             |             |             |
|---|-------------|-------------|-------------|
| C | 2.40242800  | 0.97426500  | 0.49519000  |
| C | 2.75507100  | -1.55923600 | -0.59440500 |
| H | 0.66696500  | -1.50740100 | -1.05604200 |
| C | 3.66179000  | 0.39122500  | 0.48581400  |
| H | 2.27693100  | 1.94878700  | 0.95481500  |
| C | 3.84727100  | -0.87982500 | -0.05307100 |
| H | 2.89216000  | -2.53923300 | -1.03675500 |
| H | 4.50108400  | 0.92800800  | 0.91232500  |
| H | 4.83071000  | -1.33359300 | -0.05831500 |
| O | -0.05994000 | 2.29457700  | -0.07749400 |
| H | 0.77747300  | 2.65171800  | -0.39566900 |

Intermediate 2 (**Int 2**)

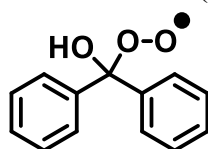

|   |             |             |             |
|---|-------------|-------------|-------------|
| C | -2.41908000 | -2.08249600 | -0.31933400 |
| C | -1.24586000 | -1.34267500 | -0.18272400 |
| C | -1.31325300 | 0.01951700  | 0.09341900  |
| C | -2.55661800 | 0.64236200  | 0.22836400  |
| C | -3.72343600 | -0.09654100 | 0.08746800  |
| C | -3.65540000 | -1.46223900 | -0.18570400 |
| H | -2.36221300 | -3.14352700 | -0.52995400 |
| H | -0.28536900 | -1.83262300 | -0.28786200 |
| H | -2.60205100 | 1.70313400  | 0.44592400  |
| H | -4.68591300 | 0.38977700  | 0.19239800  |
| H | -4.56677300 | -2.03855000 | -0.29253600 |
| C | -0.07260600 | 0.87085700  | 0.25564500  |
| C | 1.24435700  | 0.13085100  | 0.12033700  |
| C | 1.81516100  | -0.11022200 | -1.12965600 |
| C | 1.84682100  | -0.38175900 | 1.26758300  |
| C | 2.98886700  | -0.84948900 | -1.22617000 |
| H | 1.34645000  | 0.27685000  | -2.02657500 |
| C | 3.02092900  | -1.12267500 | 1.16692600  |
| H | 1.39433600  | -0.20829800 | 2.23700300  |
| C | 3.59374500  | -1.35674800 | -0.07898000 |
| H | 3.43103900  | -1.02847900 | -2.19895700 |
| H | 3.48465000  | -1.51748400 | 2.06284600  |
| H | 4.50804600  | -1.93296600 | -0.15637600 |
| O | -0.17513000 | 1.58948300  | 1.42722500  |

|   |             |            |             |
|---|-------------|------------|-------------|
| H | 0.61363400  | 2.14205700 | 1.51763900  |
| O | -0.16788900 | 1.84427300 | -0.88362200 |
| O | 0.66581900  | 2.82095100 | -0.73692900 |

Intermediate 3 (Int 3)

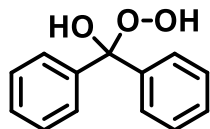

|   |             |             |             |
|---|-------------|-------------|-------------|
| C | -2.49055400 | -2.06134700 | -0.24065200 |
| C | -1.30219100 | -1.34271400 | -0.12036200 |
| C | -1.33906400 | 0.03267100  | 0.09030100  |
| C | -2.57035200 | 0.68713100  | 0.17726400  |
| C | -3.75286100 | -0.03019700 | 0.05220600  |
| C | -3.71435000 | -1.40817900 | -0.15694900 |
| H | -2.45509200 | -3.13235200 | -0.39988800 |
| H | -0.35351000 | -1.86140000 | -0.18635300 |
| H | -2.59191900 | 1.75705500  | 0.34570400  |
| H | -4.70479900 | 0.48298500  | 0.11986000  |
| H | -4.63725700 | -1.96814700 | -0.25159600 |
| C | -0.08060700 | 0.87288800  | 0.23852400  |
| C | 1.21611000  | 0.08166100  | 0.13402300  |
| C | 1.71647300  | -0.26936000 | -1.12118800 |
| C | 1.88271500  | -0.33836200 | 1.28180900  |
| C | 2.88199700  | -1.02059000 | -1.22555400 |
| H | 1.18590200  | 0.03775600  | -2.01675800 |
| C | 3.04779400  | -1.09462200 | 1.17603300  |
| H | 1.48871700  | -0.07730300 | 2.25659400  |
| C | 3.55013700  | -1.43467500 | -0.07563300 |
| H | 3.26590100  | -1.28522200 | -2.20350600 |
| H | 3.56188500  | -1.41700800 | 2.07373600  |
| H | 4.45780400  | -2.02102200 | -0.15555300 |
| O | -0.17589100 | 1.57189600  | 1.44286800  |
| H | 0.57375700  | 2.18060200  | 1.48714300  |
| O | -0.16700700 | 1.79801100  | -0.85886200 |
| O | 0.88501200  | 2.74307400  | -0.71930200 |
| H | 1.60022000  | 2.35437200  | -1.24595100 |

NHPI

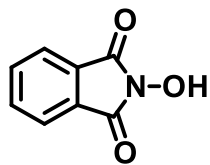

|   |             |             |             |
|---|-------------|-------------|-------------|
| C | -1.65763100 | -1.44649100 | -0.00002700 |
| C | -0.49752400 | -0.70068400 | -0.00010000 |
| C | -0.52114100 | 0.69317800  | -0.00009500 |
| C | -1.70774500 | 1.39512000  | 0.00002100  |
| C | -2.89238800 | 0.64885300  | 0.00007800  |
| C | -2.86793600 | -0.74367100 | 0.00005300  |
| H | -1.63209200 | -2.52905500 | -0.00001800 |
| H | -1.72085300 | 2.47795900  | 0.00002200  |
| H | -3.84524500 | 1.16357000  | 0.00013900  |
| H | -3.80173300 | -1.29204300 | 0.00011200  |
| C | 0.88699100  | 1.20057900  | -0.00027900 |
| C | 0.92642800  | -1.13910400 | -0.00013100 |
| N | 1.65441800  | 0.04161400  | 0.00018300  |
| O | 1.31077900  | 2.32455600  | -0.00004600 |
| O | 1.43577600  | -2.23157100 | -0.00009200 |
| O | 3.01936100  | 0.07057000  | 0.00028000  |
| H | 3.27734400  | -0.86685000 | 0.00021100  |

PINO

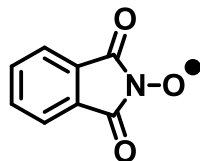

|   |             |             |             |
|---|-------------|-------------|-------------|
| C | -0.00001500 | -1.63432300 | 1.42120400  |
| C | -0.00001500 | -0.45459800 | 0.69828500  |
| C | -0.00001500 | -0.45459800 | -0.69828500 |
| C | -0.00001500 | -1.63432300 | -1.42120400 |
| C | -0.00001600 | -2.82717800 | -0.69853800 |
| C | -0.00001600 | -2.82717800 | 0.69853800  |
| H | -0.00001500 | -1.62670700 | 2.50385800  |
| H | -0.00001500 | -1.62670700 | -2.50385800 |
| H | -0.00001700 | -3.77148200 | -1.22849700 |
| H | -0.00001700 | -3.77148200 | 1.22849700  |
| C | -0.00001500 | 0.93697200  | -1.19711800 |
| C | -0.00001500 | 0.93697200  | 1.19711800  |

|   |            |            |             |
|---|------------|------------|-------------|
| N | 0.00001900 | 1.75220000 | 0.00000000  |
| O | 0.00001200 | 1.39103500 | -2.29960100 |
| O | 0.00001200 | 1.39103500 | 2.29960100  |
| O | 0.00005800 | 3.00299300 | 0.00000000  |

H<sub>2</sub>O<sub>2</sub> (2)

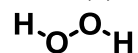

|   |             |             |             |
|---|-------------|-------------|-------------|
| O | 0.00000000  | 0.71056900  | -0.06488700 |
| H | 0.74128600  | 0.91862000  | 0.51909800  |
| O | 0.00000000  | -0.71056900 | -0.06488700 |
| H | -0.74128600 | -0.91862000 | 0.51909800  |

## References

- 1 T. Iwahama, S. Sakaguchi and Y. Ishii, *Org. Process Res. Dev.*, 2000, **4**, 94–97.
- 2 G. Zhao, B. Hu, G. W. Busser, B. Peng and M. Muhler, *ChemSusChem*, 2019, **12**, 2795–2801.
- 3 C. Matsubara, N. Kawamoto and K. Takamura, *Analyst*, 1992, **117**, 1781–1784.
- 4 V. Nardello, S. Bogaert, P. L. Alsters and J. M. Aubry, *Tetrahedron Lett.*, 2002, **43**, 8731–8734.
- 5 D. J. Frisch, M. J.; Trucks, G. W.; Schlegel, H. B.; Scuseria, G. E.; Robb, M. A.; Cheeseman, J. R.; Scalmani, G.; Barone, V.; Mennucci, B.; Petersson, G. A.; Nakatsuji, H.; Caricato, M.; Li, X.; Hratchian, H. P.; Izmaylov, A. F.; Bloino, J.; Zheng, G.; Sonnenb, *Gaussian 09*, Gaussian, Inc., Wallingford CT, Revision D., 2009.
- 6 C. J. Cramer and D. G. Truhlar, *Phys. Chem. Chem. Phys.*, 2009, **11**, 10757–10816.
